# Supplementary material for: Clinical Utility of Comprehensive Cell-free DNA Analysis to Identify Genomic Biomarkers in Patients with Newly Diagnosed Metastatic Non–small Cell Lung Cancer
Source: Oxford University Press journal article supplement (doi:10.1158/1078-0432.ccr-19-0624), 2019-04-15
Supplement: 10780432ccr190624-sup-217655_2_supp_5440596_pp9x88.xlsx [file 10780432ccr190624-sup-217655_2_supp_5440596_pp9x88.xlsx]

## Sheet: S1. Per patient Assessed
	EGFR mutation		ALK Fusion		ROS1 fusion		BRAF V600E		RET fusions		MET AMP		MET exon 14		ERBB2 mutations		KRAS mutations		PD_L1
Patient ID	cfDNA	,	cfDNA	Tissue	cfDNA	Tissue	cfDNA	Tissue	cfDNA	Tissue	cfDNA	Tissue	cfDNA	Tissue	cfDNA	Tissue	cfDNA	Tissue	Tissue
1	Negative	Negative	Negative	--	Negative	--	Negative	--	Negative	--	Negative	--	Negative	--	Negative	--	Negative	--	--
2	Negative	Negative	Negative	Negative	Negative	--	Negative	--	Negative	--	Negative	--	Negative	--	Negative	--	Negative	--	--
3	Negative	Negative	Negative	Negative	Negative	--	Negative	--	Negative	--	Negative	--	Negative	--	Negative	--	Negative	--	--
4	Negative	--	Negative	Negative	Negative	--	Negative	--	Negative	--	Negative	--	Negative	--	Negative	--	Negative	--	--
5	Negative	QNS	Negative	QNS	Negative	--	Negative	--	Negative	--	Positive (aneuploidy)	--	Negative	--	Negative	--	Negative	--	--
6	Negative	Negative	Negative	Negative	Negative	--	Negative	--	Negative	--	Negative	--	Negative	--	Negative	--	Positive	--	--
7	Negative	QNS	Negative	QNS	Negative	QNS	Negative	QNS	Negative	QNS	Negative	QNS	Negative	QNS	Negative	QNS	Negative	QNS	QNS
8	Positive	Positive	Negative	Negative	Negative	--	Negative	--	Negative	--	Negative	--	Negative	--	Negative	--	Negative	Negative	--
9	Positive	Positive	Negative	Negative	Negative	--	Negative	--	Negative	--	Negative	--	Negative	--	Negative	--	Negative	Negative	Negative
10	Negative	Negative	Negative	Negative	Negative	Negative	Negative	Negative	Negative	Negative	Negative	Negative	Negative	Negative	Negative	Negative	Positive	Positive	Positive
11	Negative	Negative	Negative	Negative	Negative	--	Negative	--	Negative	--	Negative	--	Negative	--	Negative	--	Negative	Negative	--
12	Negative	Positive	Negative	Negative	Negative	Negative	Negative	Negative	Negative	Negative	Negative	Negative	Negative	Negative	Negative	Negative	Negative	Negative	--
13	Negative	QNS	Negative	Negative	Negative	--	Negative	--	Positive	--	Negative	--	Negative	--	Negative	--	Negative	--	--
14	Negative	Negative	Negative	Negative	Negative	Negative	Negative	Negative	Negative	Negative	Negative	Negative	Negative	Negative	Negative	Negative	Negative	Negative	--
15	Negative	Negative	Negative	Negative	Negative	--	Negative	--	Negative	--	Negative	--	Negative	--	Negative	--	Negative	Negative	Positive
16	Negative	--	Negative	--	Negative	Negative	Negative	--	Negative	--	Negative	--	Negative	--	Negative	--	Positive	--	Positive
17	Negative	QNS	Negative	QNS	Negative	QNS	Negative	QNS	Negative	QNS	Positive (Focal)	QNS	Negative	QNS	Negative	QNS	Negative	QNS	QNS
18	Negative	Negative	Negative	Negative	Negative	Negative	Negative	--	Negative	--	Negative	--	Negative	--	Negative	--	Negative	--	Negative
19	Positive	QNS	Negative	QNS	Negative	--	Negative	--	Negative	--	Negative	--	Negative	--	Negative	--	Negative	--	--
20	Negative	Negative	Negative	Negative	Negative	--	Negative	--	Negative	--	Negative	--	Negative	--	Negative	--	Positive	--	--
21	Negative	Negative	Negative	Negative	Negative	Negative	Negative	--	Negative	--	Negative	--	Negative	--	Negative	--	Positive	--	Positive
22	Negative	Negative	Negative	Negative	Negative	Negative	Negative	--	Negative	--	Negative	--	Negative	--	Negative	--	Positive	--	Positive
23	Negative	Negative	Negative	Negative	Negative	Negative	Negative	--	Negative	--	Negative	--	Negative	--	Negative	--	Positive	--	Negative
24	Negative	Negative	Negative	Negative	Negative	Negative	Negative	Negative	Negative	Negative	Negative	Negative	Negative	Negative	Negative	Negative	Negative	Negative	Positive
25	Negative	Negative	Negative	Negative	Negative	Negative	Negative	--	Negative	--	Negative	--	Negative	--	Negative	--	Negative	--	Positive
26	Negative	Negative	Negative	Negative	Negative	Negative	Negative	--	Negative	--	Positive (aneuploidy)	--	Negative	--	Negative	--	Negative	--	Positive
27	Negative	Negative	Negative	Negative	Negative	--	Negative	--	Negative	--	Negative	--	Negative	--	Negative	--	Negative	--	Positive
28	Positive	Negative	Negative	Negative	Negative	--	Negative	--	Negative	--	Negative	--	Positive	--	Negative	--	Negative	--	Positive
29	Negative	--	Negative	--	Negative	--	Negative	--	Negative	--	Negative	--	Negative	--	Negative	--	Positive	--	Positive
30	Negative	QNS	Negative	QNS	Negative	QNS	Negative	QNS	Negative	QNS	Negative	QNS	Negative	QNS	Negative	QNS	Negative	QNS	QNS
31	Negative	Positive	Negative	Negative	Negative	Negative	Negative	--	Negative	--	Negative	--	Negative	--	Negative	--	Negative	--	Negative
32	Negative	QNS	Negative	QNS	Negative	QNS	Negative	QNS	Negative	QNS	Negative	QNS	Negative	QNS	Negative	QNS	Positive	QNS	Positive
33	Negative	Negative	Negative	Negative	Negative	QNS	Negative	QNS	Negative	QNS	Negative	QNS	Negative	QNS	Negative	QNS	Negative	QNS	QNS
34	Negative	Negative	Negative	Negative	Negative	Negative	Negative	--	Negative	--	Negative	--	Negative	--	Negative	--	Positive	--	--
35	Negative	Negative	Negative	Negative	Negative	Negative	Negative	--	Negative	--	Negative	--	Negative	--	Negative	--	Positive	--	--
36	Positive	Positive	Negative	--	Negative	--	Negative	--	Negative	--	Negative	--	Negative	--	Negative	--	Negative	--	--
37	Negative	Negative	Negative	Negative	Negative	Negative	Negative	--	Negative	--	Negative	--	Negative	--	Negative	--	Positive	--	--
38	Negative	Negative	Negative	Negative	Negative	Negative	Negative	--	Negative	--	Negative	--	Negative	--	Negative	--	Positive	--	--
39	Negative	Negative	Negative	Negative	Negative	Negative	Negative	--	Negative	--	Negative	--	Negative	--	Negative	--	Negative	--	--
40	Negative	Negative	Negative	Negative	Negative	Negative	Negative	--	Negative	--	Negative	--	Negative	--	Negative	--	Positive	--	Positive
41	Negative	Negative	Negative	Negative	Negative	Negative	Negative	--	Negative	--	Negative	--	Negative	--	Negative	--	Negative	--	Negative
42	TND	Negative	TND	Negative	TND	Negative	TND	--	TND	--	TND	--	TND	--	TND	--	TND	--	Positive
43	Negative	Negative	Negative	Negative	Negative	Negative	Negative	--	Negative	--	Negative	--	Negative	--	Negative	--	Negative	--	Negative
44	Negative	Negative	Negative	Negative	Negative	Negative	Negative	--	Negative	--	Negative	--	Negative	--	Negative	--	Positive	--	Positive
45	Negative	Negative	Negative	Negative	Negative	Negative	Negative	Negative	Negative	--	Negative	--	Negative	--	Negative	--	Negative	--	Positive
46	Negative	Negative	Negative	Negative	Negative	Negative	Negative	Negative	Negative	--	Negative	--	Negative	--	Negative	--	Negative	--	Positive
47	Negative	Negative	Negative	--	Negative	--	Negative	Negative	Negative	--	Negative	--	Negative	--	Negative	--	Negative	--	Positive
48	Negative	Negative	Negative	Negative	Negative	Negative	Negative	Negative	Negative	Negative	Negative	Negative	Negative	Negative	Negative	Negative	Positive	Positive	Positive
49	Positive	Negative (not assessed for cfDNA identified EGFR mutation)	Negative	--	Negative	--	Negative	--	Negative	--	Negative	--	Negative	--	Negative	--	Positive	--	--
50	Negative	Negative	Negative	Negative	Negative	Negative	Negative	--	Negative	--	Negative	--	Negative	--	Negative	--	Positive	Negative	Negative
51	Negative	Negative	Negative	Negative	Negative	QNS	Negative	--	Negative	--	Negative	--	Negative	--	Negative	--	Positive	QNS	Positive
52	Negative	Negative	Negative	Negative	Negative	QNS	Negative	--	Negative	--	Negative	--	Negative	--	Negative	--	Positive	--	Positive
53	Negative	Negative	Negative	--	Negative	Negative	Negative	--	Negative	--	Negative	--	Negative	--	Negative	--	Negative	Positive	Positive
54	Negative	Negative	Negative	Negative	Negative	QNS	Negative	--	Negative	--	Negative	--	Negative	--	Negative	--	Positive	--	Negative
55	Positive	Positive	Negative	Negative	Negative	Negative	Negative	Negative	Negative	Negative	Negative	Negative	Negative	Negative	Negative	Negative	Negative	Negative	Negative
56	Negative	Negative	Negative	Negative	Negative	Negative	Negative	--	Negative	--	Negative	--	Negative	--	Negative	--	Positive	Positive	Positive
57	Positive	Positive	Negative	Negative	Negative	Negative	Negative	--	Negative	--	Positive (aneuploidy)	--	Negative	--	Negative	--	Negative	--	Negative
58	Negative	Negative	Negative	Negative	Negative	Negative	Negative	Negative	Negative	Negative	Negative	Negative	Negative	Negative	Negative	Negative	Negative	Positive	Positive
59	Negative	Negative	Negative	Negative	Negative	Negative	Negative	--	Negative	--	Negative	--	Negative	--	Negative	--	Positive	Positive	Negative
60	TND	Negative	TND	Negative	TND	Negative	TND	Negative	TND	Negative	TND	Negative	TND	Negative	TND	Negative	TND	Negative	Negative
61	Negative	Negative	Negative	Negative	Negative	Negative	Negative	Negative	Negative	--	Negative	--	Negative	--	Negative	--	Negative	--	Positive
62	Negative	QNS	Negative	Negative	Negative	Negative	Negative	QNS	Negative	QNS	Negative	QNS	Negative	QNS	Negative	QNS	Negative	QNS	Negative
63	Negative	QNS	Negative	Negative	Negative	Negative	Negative	QNS	Negative	QNS	Negative	QNS	Negative	QNS	Negative	QNS	Positive	QNS	Negative
64	Positive	Positive	Negative	Negative	Negative	Negative	Negative	Negative	Negative	Negative	Negative	Negative	Negative	Negative	Negative	Negative	Negative	Negative	Positive
65	Negative	Negative	Negative	Negative	Negative	Negative	Negative	QNS	Negative	Negative	Negative	QNS	Negative	QNS	Negative	QNS	Negative	QNS	QNS
66	Negative	QNS	Negative	Negative	Negative	Negative	Negative	Negative	Negative	--	Negative	--	Negative	--	Negative	--	Positive	--	Positive
67	Negative	Negative	Negative	Negative	Negative	--	Negative	--	Negative	--	Negative	--	Negative	--	Negative	--	Negative	--	Positive
68	Negative	Negative	Negative	Negative	Negative	Negative	Negative	--	Negative	--	Negative	--	Negative	--	Negative	--	Negative	--	Negative
69	Negative	Negative	Negative	Negative	Negative	Negative	Negative	--	Negative	--	Negative	--	Negative	--	Negative	--	Negative	--	Positive
70	Positive	Positive	Negative	Negative	Negative	Negative	Negative	--	Negative	--	Negative	--	Negative	--	Negative	--	Negative	--	Positive
71	Positive	Positive	Negative	Negative	Negative	Negative	Negative	--	Negative	--	Negative	--	Negative	--	Negative	--	Negative	--	Positive
72	Negative	QNS	Negative	QNS	Negative	QNS	Negative	--	Negative	--	Negative	--	Negative	--	Negative	--	Negative	--	--
73	TND	QNS	TND	--	TND	QNS	TND	--	TND	--	TND	--	TND	--	TND	--	TND	QNS	--
74	Positive	QNS	Negative	Negative	Negative	--	Negative	--	Negative	--	Negative	--	Negative	--	Negative	--	Negative	--	--
75	Negative	Negative	Negative	Negative	Negative	--	Negative	--	Negative	--	Negative	--	Negative	--	Negative	--	Positive	--	--
76	Canceled	--	Canceled	Negative	Canceled	Negative	Canceled	--	Canceled	Negative	Canceled	Negative	Canceled	Negative	Canceled	--	TND	--	Positive
77	Negative	Negative	Negative	Negative	Negative	Negative	Negative	--	Negative	--	Negative	--	Negative	--	Negative	--	Negative	--	Negative
78	Negative	Negative	Negative	Negative	Negative	--	Negative	Negative	Negative	--	Negative	--	Negative	--	Negative	--	Negative	Negative	Positive
79	Negative	--	Negative	--	Negative	--	Negative	--	Negative	--	Negative	--	Negative	--	Negative	--	Negative	--	Positive
80	Negative	Negative	Negative	Negative	Negative	Positive	Negative	--	Negative	--	Negative	--	Negative	--	Negative	--	Negative	--	Positive
81	Negative	Negative	Negative	Negative	Negative	--	Negative	--	Negative	--	Negative	--	Negative	--	Negative	--	Negative	--	--
82	Negative	Negative	Negative	Negative	Negative	--	Negative	--	Negative	--	Negative	--	Negative	--	Negative	--	Negative	Negative	--
83	Negative	Negative	Negative	Negative	Negative	Negative	Negative	Negative	Negative	Negative	Negative	Negative	Negative	Negative	Negative	Negative	Positive	Positive	Positive
84	Negative	Negative	Negative	Negative	Negative	--	Negative	--	Negative	--	Negative	--	Negative	--	Negative	--	Negative	--	--
85	Negative	Negative	Negative	Negative	Negative	QNS	Negative	--	Negative	--	Negative	--	Negative	--	Negative	--	Negative	--	QNS
86	Negative	Negative	Negative	Negative	Negative	Negative	Negative	Negative	Negative	Negative	Negative	Negative	Positive	Positive	Negative	Negative	Negative	Negative	Positive
87	TND	Negative	TND	Negative	TND	Negative	TND	Negative	TND	--	TND	--	TND	--	TND	--	TND	--	Negative
88	Negative	Negative	Negative	Negative	Negative	Negative	Negative	Negative	Negative	--	Negative	--	Negative	--	Negative	--	Negative	--	Negative
89	TND	Positive	TND	Negative	TND	Negative	TND	Negative	TND	Negative	TND	Negative	TND	Negative	TND	Negative	TND	Negative	Negative
90	Negative	Negative	Negative	Negative	Negative	Negative	Negative	Negative	Negative	Negative	Negative	Negative	Negative	Negative	Negative	Negative	Negative	Negative	Positive
91	Negative	Negative	Negative	Negative	Negative	Negative	Negative	Negative	Negative	Negative	Negative	Negative	Negative	Negative	Negative	Negative	Negative	Negative	Negative
92	Negative	Negative	Negative	Negative	Negative	Negative	Negative	Negative	Negative	Negative	Negative	Negative	Negative	Negative	Negative	Negative	Negative	Negative	Positive
93	Negative	Negative	Negative	Negative	Negative	Negative	Negative	--	Negative	--	Negative	--	Negative	--	Negative	--	Negative	--	Positive
94	Negative	Negative	Negative	--	Negative	--	Negative	--	Negative	--	Negative	--	Negative	--	Negative	--	Negative	--	--
95	Negative	--	Negative	--	Negative	--	Negative	--	Negative	--	Negative	--	Negative	--	Positive	--	Negative	--	Positive
96	Negative	Negative	Negative	Negative	Negative	Negative	Negative	Negative	Negative	Negative	Negative	Negative	Negative	Negative	Negative	Negative	Negative	Positive	Negative
97	Negative	Positive	Negative	Negative	Negative	Negative	Negative	--	Negative	--	Negative	--	Negative	--	Negative	--	Negative	--	Positive
98	Negative	Negative	Negative	QNS	Negative	Negative	Positive	Positive	Negative	QNS	Negative	QNS	Negative	QNS	Negative	Negative	Negative	--	QNS
99	Negative	Negative	Negative	Negative	Negative	QNS	Negative	Negative	Negative	QNS	Negative	Negative	Negative	--	Negative	--	Negative	--	Negative
100	Negative	Negative	Negative	Negative	Negative	Negative	Negative	Negative	Negative	Negative	Negative	Negative	Negative	--	Negative	--	Negative	--	Negative
101	Negative	Negative	Negative	Negative	Negative	Negative	Negative	Negative	Negative	Negative	Negative	Negative	Negative	Negative	Negative	--	Negative	--	Positive
102	Negative	Negative	Negative	Negative	Negative	Negative	Negative	Negative	Negative	Negative	Negative	Negative	Negative	--	Negative	--	Negative	--	Negative
103	Negative	Negative	Negative	QNS	Negative	QNS	Negative	--	Negative	--	Negative	--	Negative	--	Negative	--	Positive	--	Positive
104	Negative	Negative	Negative	Negative	Negative	--	Negative	--	Negative	--	Negative	--	Negative	--	Negative	--	Negative	--	--
105	Negative	Negative	Negative	Negative	Negative	--	Negative	--	Negative	--	Negative	--	Negative	--	Negative	--	Negative	--	Negative
106	Negative	Negative	Negative	Negative	Negative	Negative	Negative	--	Negative	--	Negative	--	Negative	--	Negative	--	Positive	--	--
107	Negative	Negative	Negative	QNS	Negative	QNS	Negative	--	Negative	--	Negative	--	Negative	--	Negative	--	Positive	--	--
108	Negative	Negative	Negative	Negative	Negative	Negative	Negative	--	Negative	--	Negative	--	Negative	--	Negative	--	Positive	--	Positive
109	Negative	Negative	Negative	Negative	Negative	Negative	Negative	--	Negative	--	Negative	--	Negative	--	Negative	--	Negative	--	Positive
110	Negative	Negative	Negative	Negative	Negative	Negative	Negative	--	Negative	--	Negative	--	Negative	--	Negative	--	Negative	--	Positive
111	Negative	Negative	Negative	Negative	Negative	Negative	Negative	--	Negative	--	Negative	--	Negative	--	Negative	--	Positive	--	Positive
112	Negative	Negative	Negative	Negative	Negative	Negative	Negative	--	Negative	--	Negative	--	Negative	--	Negative	--	Negative	--	Positive
113	Negative	Negative	Negative	Negative	Negative	Negative	Negative	--	Negative	--	Negative	--	Negative	--	Negative	--	Negative	--	Positive
114	Negative	Negative	Negative	Negative	Negative	Negative	Negative	--	Negative	--	Negative	--	Negative	--	Negative	--	Positive	--	Positive
115	Negative	Negative	Negative	Negative	Negative	Negative	Negative	--	Negative	--	Negative	--	Negative	--	Negative	--	Negative	--	Positive
116	Negative	Negative	Negative	Negative	Negative	Negative	Negative	--	Negative	--	Positive (Focal)	--	Negative	--	Negative	--	Negative	--	Positive
117	Negative	Negative	Negative	Negative	Negative	Negative	Negative	--	Negative	--	Negative	--	Negative	--	Negative	--	Negative	--	Negative
118	Negative	Negative	Negative	Negative	Negative	Negative	Negative	--	Negative	--	Negative	--	Negative	--	Negative	--	Positive	--	Positive
119	Positive	QNS	Negative	QNS	Negative	QNS	Negative	QNS	Negative	QNS	Negative	QNS	Negative	QNS	Negative	QNS	Negative	QNS	QNS
120	Negative	Negative	Negative	Negative	Negative	Negative	Negative	Negative	Negative	--	Negative	--	Negative	--	Negative	--	Negative	--	Positive
121	Negative	Negative	Negative	Negative	Negative	Negative	Negative	--	Negative	--	Positive (Focal)	--	Negative	--	Negative	--	Negative	--	Positive
122	Negative	Negative	Negative	Negative	Negative	Negative	Negative	Negative	Negative	--	Negative	--	Negative	--	Negative	--	Positive	--	Positive
123	TND	Negative	TND	--	TND	--	TND	--	TND	--	TND	--	TND	--	TND	--	TND	--	--
124	Negative	Negative	Negative	Negative	Negative	Negative	Negative	Negative	Negative	Negative	Negative	Negative	Negative	Negative	Negative	Negative	Positive	Positive	Negative
125	Positive	Positive	Negative	--	Negative	--	Negative	--	Negative	--	Negative	--	Negative	--	Negative	--	Negative	--	--
126	Negative	Positive	Negative	Negative	Negative	Negative	Negative	--	Negative	--	Negative	--	Negative	--	Negative	--	Negative	--	--
127	Negative	Negative	Negative	QNS	Negative	Negative	Negative	Negative	Negative	QNS	Negative	QNS	Negative	QNS	Negative	--	Negative	--	Positive
128	Negative	--	Positive	Positive	Negative	Negative	Negative	Negative	Negative	--	Negative	--	Negative	--	Negative	--	Negative	--	--
129	Negative	--	Negative	--	Negative	--	Negative	--	Negative	--	Negative	--	Negative	--	Negative	--	Positive	--	Positive
130	Negative	Negative	Negative	Negative	Negative	Negative	Negative	Negative	Negative	--	Positive (Focal)	--	Negative	--	Negative	Negative	Negative	--	Positive
131	Negative	--	Positive	Positive	Negative	QNS	Negative	--	Negative	QNS	Negative	QNS	Negative	QNS	Negative	QNS	Negative	--	--
132	Negative	Negative	Negative	Negative	Negative	Negative	Negative	--	Negative	Negative	Negative	Negative	Negative	--	Negative	--	Positive	Positive	Negative
133	Negative	Negative	Negative	Negative	Negative	Negative	Negative	Negative	Negative	Negative	Positive (aneuploidy)	--	Negative	--	Negative	--	Negative	--	QNS
134	Negative	Negative	Positive	QNS	Negative	QNS	Negative	--	Negative	--	Negative	--	Negative	--	Negative	--	Negative	--	Negative
135	Negative	Negative	Negative	Negative	Negative	Negative	Negative	Negative	Negative	Negative	Negative	Negative	Negative	Negative	Negative	Negative	Negative	Negative	Positive
136	Negative	--	Negative	QNS	Negative	--	Negative	--	Negative	--	Negative	--	Negative	--	Negative	--	Positive	--	QNS
137	Negative	--	Negative	--	Negative	--	Negative	--	Negative	--	Negative	--	Negative	--	Negative	--	Negative	--	Positive
138	Negative	Negative	Negative	Negative	Negative	Negative	Negative	--	Negative	--	Negative	--	Negative	--	Negative	--	Positive	--	Positive
139	Negative	QNS	Negative	QNS	Negative	QNS	Negative	--	Negative	--	Negative	--	Negative	--	Negative	--	Negative	--	Negative
140	Positive	Positive	Negative	Negative	Negative	Negative	Negative	Negative	Negative	Negative	Negative	Negative	Negative	Negative	Negative	Negative	Negative	Negative	--
141	Negative	QNS	Negative	QNS	Negative	QNS	Negative	QNS	Negative	--	Negative	--	Negative	--	Negative	--	Negative	--	Negative
142	Negative	Negative	Negative	Negative	Negative	Negative	Negative	Negative	Negative	Negative	Positive (aneuploidy)	Negative	Negative	Negative	Negative	Negative	Negative	Negative	--
143	Positive	Positive	Negative	Negative	Negative	Negative	Negative	Negative	Negative	Negative	Negative	Negative	Negative	Negative	Negative	Negative	Negative	Negative	Positive
144	Negative	Negative	Negative	Negative	Negative	Negative	Negative	Negative	Negative	Negative	Negative	Negative	Negative	Negative	Negative	Negative	Positive	Positive	Positive
145	Negative	Negative	Negative	Negative	Negative	Negative	Negative	Negative	Negative	Negative	Negative	Negative	Negative	Negative	Negative	Negative	Negative	Negative	Positive
146	Negative	Negative	Negative	Negative	Negative	Negative	Negative	Negative	Negative	--	Negative	--	Negative	--	Negative	Negative	Negative	Negative	Positive
147	Negative	Negative	Negative	Negative	Negative	--	Negative	--	Negative	--	Negative	--	Negative	--	Negative	--	Negative	--	Positive
148	Positive	Positive	Negative	Negative	Negative	Negative	Negative	Negative	Negative	Negative	Negative	Negative	Negative	Negative	Negative	Negative	Negative	Negative	Negative
149	Positive	Positive	Negative	Negative	Negative	Negative	Negative	Negative	Negative	Negative	Negative	Negative	Negative	Negative	Negative	Negative	Negative	Negative	Negative
150	Negative	Negative	Negative	Negative	Negative	Negative	Negative	--	Negative	--	Negative	--	Negative	--	Negative	--	Positive	--	Positive
151	Negative	--	Negative	Positive	Negative	--	Negative	--	Negative	--	Positive (aneuploidy)	Negative	Negative	Negative	Negative	--	Negative	--	Positive
152	Negative	Negative	Negative	Negative	Negative	--	Negative	--	Negative	--	Negative	--	Negative	--	Negative	--	Positive	Positive	--
153	Negative	Negative	Negative	Negative	Negative	Negative	Negative	Negative	Negative	--	Negative	--	Negative	--	Negative	--	Negative	Negative	Positive
154	Negative	Negative	Negative	Negative	Negative	Negative	Negative	Negative	Negative	Negative	Negative	Negative	Negative	Negative	Negative	Negative	Positive	Positive	Positive
155	Negative	Negative	Negative	Negative	Negative	Negative	Negative	Negative	Negative	Negative	Positive (aneuploidy)	Negative	Negative	Negative	Positive	Positive	Negative	Negative	Positive
156	TND	Negative	TND	Negative	TND	Negative	TND	Negative	TND	Negative	TND	Negative	TND	Negative	TND	Negative	TND	Negative	--
157	Negative	Negative	Negative	Negative	Negative	Negative	Negative	Negative	Negative	Negative	Negative	Negative	Positive	Positive	Negative	Negative	Negative	Negative	Negative
158	Negative	QNS	Negative	QNS	Negative	QNS	Negative	QNS	Negative	QNS	Negative	QNS	Negative	QNS	Negative	QNS	Negative	QNS	QNS
159	Negative	Negative	Negative	Negative	Negative	Negative	Negative	Negative	Negative	Negative	Negative	Negative	Positive	--	Negative	Negative	Positive	Positive	Positive
160	Positive	Positive	Negative	Negative	Negative	Negative	Negative	Negative	Negative	Negative	Negative	Negative	Negative	Negative	Negative	Negative	Negative	Negative	--
161	Positive	Positive	Negative	Negative	Negative	--	Negative	--	Negative	--	Negative	--	Negative	--	Negative	--	Negative	--	--
162	Negative	Negative	Negative	Negative	Negative	Negative	Negative	Negative	Negative	Negative	Negative	Negative	Negative	Negative	Negative	Negative	Negative	Negative	--
163	Negative	Negative	Negative	Negative	Negative	Negative	Negative	--	Negative	--	Negative	--	Negative	--	Negative	--	Negative	--	Positive
164	Negative	Negative	Negative	Negative	Negative	--	Negative	--	Negative	--	Negative	--	Negative	--	Negative	--	Positive	--	--
165	Negative	Negative	Negative	Negative	Negative	--	Negative	--	Negative	--	Negative	--	Negative	--	Negative	--	Negative	--	Negative
166	Negative	Negative	Negative	Negative	Negative	--	Positive	Positive	Negative	--	Negative	--	Negative	--	Negative	--	Negative	--	Positive
167	Negative	Negative	Negative	Negative	Negative	--	Negative	--	Positive	--	Negative	--	Negative	--	Negative	--	Negative	--	--
168	Positive	Negative (not assessed for cfDNA identified EGFR mutation)	Negative	Negative	Negative	--	Negative	--	Negative	--	Negative	--	Negative	--	Negative	--	Negative	--	--
169	Negative	Negative	Negative	Positive	Negative	--	Negative	--	Negative	--	Negative	--	Negative	--	Negative	--	Negative	--	--
170	Negative	Negative	Negative	Negative	Negative	--	Negative	QNS	Negative	QNS	Negative	QNS	Negative	QNS	Negative	QNS	Positive	QNS	Positive
171	Positive	Positive	Negative	Negative	Negative	--	Negative	--	Negative	--	Negative	--	Negative	--	Negative	--	Negative	--	Negative
172	Negative	Negative	Negative	Negative	Negative	--	Negative	--	Negative	--	Negative	--	Negative	--	Negative	--	Negative	--	Positive
173	Negative	Negative	Negative	Negative	Negative	--	Negative	--	Negative	--	Negative	--	Negative	--	Negative	--	Positive	--	--
174	Negative	Negative	Negative	Negative	Negative	--	Negative	--	Negative	--	Negative	--	Negative	--	Negative	--	Negative	--	Negative
175	Negative	Negative	Negative	--	Negative	--	Negative	--	Negative	--	Negative	--	Negative	--	Negative	--	Positive	--	QNS
176	TND	Negative	TND	Negative	TND	--	TND	--	TND	--	TND	--	TND	--	TND	--	TND	--	Negative
177	Negative	Negative	Negative	Negative	Negative	Negative	Negative	Negative	Negative	--	Negative	--	Negative	--	Negative	--	Negative	--	--
178	Negative	Negative	Negative	Negative	Negative	--	Negative	--	Negative	--	Negative	--	Negative	--	Negative	--	Negative	--	Negative
179	Negative	Negative	Negative	Negative	Negative	--	Negative	--	Negative	--	Negative	--	Negative	--	Negative	--	Negative	--	Positive
180	Positive	Positive	Negative	Negative	Negative	--	Negative	--	Negative	--	Negative	--	Negative	--	Negative	--	Negative	--	--
181	Negative	Negative	Negative	Negative	Negative	--	Negative	--	Negative	--	Negative	--	Positive	--	Negative	--	Negative	--	Positive
182	Negative	Negative	Positive	Positive	Negative	--	Negative	--	Negative	--	Negative	--	Negative	--	Negative	--	Negative	--	Positive
183	Positive	QNS	Negative	QNS	Negative	--	Negative	--	Negative	--	Negative	--	Negative	--	Negative	--	Negative	--	QNS
184	Negative	Negative	Negative	Negative	Negative	--	Negative	--	Negative	--	Negative	--	Negative	--	Negative	--	Negative	--	--
185	Positive	Positive	Negative	Negative	Negative	--	Negative	--	Negative	--	Negative	--	Negative	--	Negative	--	Negative	--	Positive
186	Negative	Negative	Negative	Negative	Negative	--	Negative	--	Negative	--	Negative	--	Negative	--	Negative	--	Positive	--	Positive
187	Negative	Negative	Negative	Negative	Negative	--	Negative	--	Negative	--	Negative	--	Negative	--	Negative	--	Positive	--	Positive
188	Negative	Negative	Positive	Positive	Negative	--	Negative	--	Negative	--	Negative	--	Negative	--	Negative	--	Positive	--	Positive
189	Negative	Negative	Negative	Negative	Negative	--	Negative	--	Negative	--	Negative	--	Negative	--	Negative	--	Negative	--	Positive
190	Positive	Positive	Negative	Negative	Negative	--	Negative	--	Negative	--	Negative	--	Negative	--	Negative	--	Negative	--	QNS
191	TND	Negative	TND	Negative	TND	--	TND	--	TND	--	TND	--	TND	--	TND	--	TND	--	Positive
192	Negative	Negative	Negative	Negative	Negative	--	Negative	--	Negative	--	Negative	--	Negative	--	Negative	--	Negative	--	Negative
193	Negative	Negative	Negative	Negative	Negative	--	Negative	--	Negative	--	Negative	--	Negative	--	Negative	--	Negative	--	Negative
194	Negative	Negative	Negative	Negative	Negative	--	Negative	--	Negative	--	Negative	--	Negative	--	Negative	--	Positive	--	Positive
195	TND	Negative	TND	Negative	TND	--	TND	--	TND	--	TND	--	TND	--	TND	--	TND	--	Positive
196	Negative	Negative	Negative	Negative	Negative	Negative	Negative	--	Negative	--	Negative	--	Negative	--	Negative	--	Positive	--	Positive
197	Negative	Negative	Negative	Negative	Negative	--	Negative	--	Negative	--	Negative	--	Negative	--	Negative	--	Negative	--	Negative
198	Negative	Negative	Negative	Negative	Negative	Negative	Negative	--	Negative	--	Negative	--	Negative	--	Negative	--	Negative	--	--
199	Negative	Negative	Negative	Negative	Negative	Negative	Negative	Negative	Negative	--	Negative	--	Negative	--	Negative	Negative	Positive	Positive	Positive
200	Negative	Negative	Negative	Negative	Negative	Negative	Negative	--	Negative	--	Negative	--	Negative	--	Negative	--	Positive	--	Positive
201	Negative	QNS	Negative	QNS	Negative	QNS	Negative	--	Negative	--	Negative	--	Negative	--	Negative	--	Positive	--	Positive
202	Negative	Negative	Negative	Negative	Negative	Negative	Negative	--	Negative	--	Negative	--	Negative	--	Negative	--	Negative	Negative	Positive
203	Negative	Negative	Negative	QNS	Negative	--	Negative	--	Negative	--	Negative	--	Negative	--	Negative	--	Negative	--	QNS
204	Positive	Positive	Negative	Negative	Negative	Negative	Negative	Negative	Negative	Negative	Negative	Negative	Negative	--	Negative	--	Negative	--	Positive
205	Negative	Negative	Negative	Positive	Negative	Negative	Negative	Negative	Negative	--	Negative	--	Negative	--	Negative	--	Negative	--	Positive
206	Positive	Positive	Negative	--	Negative	--	Negative	--	Negative	--	Negative	--	Negative	--	Negative	--	Negative	--	Positive
207	Negative	--	Negative	--	Negative	--	Negative	--	Negative	--	Negative	--	Negative	--	Negative	--	Negative	--	Positive
208	TND	--	TND	Positive	TND	--	TND	--	TND	--	TND	--	TND	--	TND	--	TND	--	--
209	Negative	Negative	Negative	Negative	Negative	Negative	Negative	Negative	Negative	--	Negative	--	Negative	--	Negative	--	Positive	--	Negative
210	Positive	Positive	Negative	Negative	Negative	Negative	Negative	--	Negative	--	Negative	--	Negative	--	Negative	--	Negative	--	Positive
211	Negative	Negative	Negative	Negative	Negative	Negative	Negative	Negative	Negative	--	Negative	--	Positive	--	Negative	--	Negative	--	Negative
212	Negative	Negative	Negative	Negative	Negative	Negative	Negative	--	Negative	--	Negative	--	Negative	--	Negative	--	Negative	--	Positive
213	Negative	Negative	Negative	Negative	Negative	Positive	Negative	--	Negative	--	Positive (Focal)	--	Negative	--	Negative	--	Positive	--	Negative
214	Positive	Positive	Negative	Negative	Negative	Negative	Negative	Negative	Negative	--	Negative	--	Negative	--	Negative	--	Negative	--	Positive
215	Negative	Negative	Negative	Negative	Negative	Negative	Negative	--	Negative	--	Negative	--	Negative	--	Negative	--	Positive	--	Positive
216	Negative	--	Negative	Negative	Negative	--	Negative	--	Negative	--	Negative	--	Negative	--	Negative	--	Negative	--	Positive
217	Negative	QNS	Negative	QNS	Negative	QNS	Negative	QNS	Negative	--	Negative	QNS	Negative	QNS	Negative	--	Negative	--	Positive
218	Negative	Negative	Positive	Positive	Negative	Negative	Negative	Negative	Negative	--	Negative	Negative	Negative	Negative	Negative	--	Negative	--	Negative
219	Negative	QNS	Negative	--	Negative	--	Negative	--	Negative	--	Negative	Negative	Positive	Positive	Negative	--	Negative	--	QNS
220	Negative	Negative	Negative	Negative	Negative	Negative	Negative	Negative	Negative	--	Negative	Negative	Negative	Negative	Negative	--	Negative	--	Positive
221	Negative	Negative	Negative	Negative	Negative	Negative	Negative	Negative	Negative	--	Negative	--	Positive	Positive	Negative	--	Negative	--	Positive
222	Negative	Negative	Negative	Negative	Negative	Negative	Negative	Negative	Negative	--	Negative	--	Negative	Negative	Negative	--	Positive	--	Positive
223	Negative	Negative	Negative	Negative	Negative	Negative	Negative	Negative	Negative	--	Negative	--	Negative	Negative	Negative	--	Negative	--	Positive
224	Negative	Negative	Negative	Negative	Negative	Negative	Negative	--	Negative	--	Negative	--	Negative	--	Negative	--	Positive	--	Negative
225	Negative	Positive	Negative	Negative	Negative	Negative	Negative	--	Negative	--	Negative	--	Negative	--	Negative	--	Negative	--	Negative
226	Negative	QNS	Negative	QNS	Negative	QNS	Negative	--	Negative	--	Negative	--	Negative	--	Negative	--	Positive	--	Positive
227	Negative	--	Negative	--	Negative	--	Negative	Negative	Negative	--	Negative	--	Negative	--	Negative	--	Negative	--	QNS
228	Negative	Negative	Negative	Negative	Negative	Negative	Negative	Negative	Negative	--	Negative	--	Negative	--	Negative	--	Positive	Positive	Positive
229	Negative	Negative	Negative	Negative	Negative	Negative	Negative	Negative	Positive	--	Negative	--	Negative	--	Negative	--	Negative	--	Negative
230	Negative	Negative	Negative	Negative	Negative	Negative	Negative	Negative	Negative	--	Negative	--	Positive	--	Negative	--	Positive	Positive	Positive
231	Negative	QNS	Negative	QNS	Negative	QNS	Negative	QNS	Negative	--	Negative	--	Negative	--	Negative	--	Negative	--	QNS
232	Positive	Positive	Negative	--	Negative	Negative	Negative	Negative	Negative	Negative	Negative	Negative	Negative	Negative	Negative	--	Negative	--	Positive
233	Negative	Negative	Negative	QNS	Negative	QNS	Negative	Negative	Negative	--	Negative	--	Negative	--	Negative	--	Positive	--	Negative
234	Negative	QNS	Negative	QNS	Negative	QNS	Negative	QNS	Negative	--	Negative	--	Negative	--	Negative	--	Negative	--	QNS
235	Negative	QNS	Negative	Negative	Negative	QNS	Negative	QNS	Negative	QNS	Negative	QNS	Negative	QNS	Negative	QNS	Negative	QNS	Negative
236	Negative	Negative	Negative	Negative	Negative	Negative	Negative	Negative	Negative	Negative	Negative	Negative	Negative	Negative	Negative	Negative	Positive	Positive	Negative
237	Negative	Negative	Negative	Negative	Negative	Negative	Negative	--	Negative	--	Negative	--	Negative	--	Negative	--	Positive	--	--
238	Negative	Negative	Negative	Negative	Negative	Negative	Negative	Negative	Negative	Negative	Negative	Negative	Negative	Negative	Negative	Negative	Positive	Positive	Positive
239	Negative	Negative	Negative	Negative	Negative	Negative	Negative	Negative	Negative	Negative	Negative	Negative	Negative	Negative	Negative	Negative	Negative	Negative	Positive
240	Negative	Negative	Negative	--	Negative	--	Negative	--	Negative	--	Negative	--	Negative	--	Positive	--	Negative	--	Negative
241	Negative	Negative	Negative	Negative	Negative	Negative	Negative	Negative	Negative	Negative	Negative	Negative	Negative	Negative	Negative	Negative	Negative	Negative	Negative
242	Negative	Negative	Negative	Negative	Negative	Negative	Negative	Negative	Negative	Negative	Negative	Negative	Negative	Negative	Negative	Negative	Positive	Positive	Negative
243	Positive	--	Negative	--	Negative	--	Negative	--	Negative	--	Negative	--	Negative	--	Negative	--	Negative	--	Negative
244	Negative	QNS	Negative	Negative	Negative	Negative	Negative	QNS	Negative	--	Negative	--	Negative	--	Negative	--	Positive	--	Positive
245	TND	Negative	TND	Negative	TND	Negative	TND	Negative	TND	Negative	TND	Negative	TND	Negative	TND	Negative	TND	Negative	Positive
246	Negative	Negative	Negative	Negative	Negative	Negative	Negative	Negative	Negative	Negative	Negative	Negative	Negative	Negative	Negative	Negative	Positive	Positive	Positive
247	Positive	Positive	Negative	Negative	Negative	Negative	Negative	Negative	Negative	Negative	Negative	Negative	Negative	Negative	Negative	Negative	Negative	Negative	Negative
248	Negative	Negative	Negative	Negative	Negative	--	Negative	--	Negative	--	Negative	--	Negative	--	Negative	--	Negative	--	Negative
249	Negative	Negative	Negative	--	Negative	--	Negative	Negative	Negative	--	Negative	--	Negative	--	Negative	--	Positive	--	Positive
250	Negative	Positive	Negative	Negative	Negative	Negative	Negative	Negative	Negative	Negative	Negative	Negative	Negative	Negative	Negative	Negative	Negative	Negative	--
251	Negative	Negative	Negative	Negative	Negative	Negative	Negative	Negative	Negative	Negative	Negative	Negative	Negative	Negative	Negative	Negative	Negative	Negative	--
252	Negative	--	Negative	--	Negative	--	Negative	--	Negative	--	Negative	--	Negative	--	Negative	--	Positive	--	Positive
253	Negative	Negative	Negative	Negative	Negative	Negative	Negative	Negative	Negative	Negative	Positive (aneuploidy)	Negative	Negative	Positive	Negative	Negative	Positive	Positive	--
254	Negative	--	Negative	--	Negative	--	Negative	--	Negative	--	Negative	--	Negative	--	Negative	--	Positive	--	Negative
255	Positive	Negative (not assessed for cfDNA identified EGFR mutation)	Negative	Negative	Negative	Negative	Negative	Negative	Negative	--	Negative	--	Negative	--	Negative	--	Negative	Negative	Positive
256	Negative	Negative	Negative	Negative	Negative	Negative	Negative	--	Negative	--	Negative	--	Negative	--	Negative	--	Positive	--	Positive
257	Positive	Positive	Negative	Negative	Negative	Negative	Negative	Negative	Negative	Negative	Positive (aneuploidy)	Negative	Negative	Negative	Negative	Negative	Negative	Negative	--
258	Positive	Positive	Negative	Negative	Negative	Negative	Negative	Negative	Negative	Negative	Negative	Negative	Positive	Negative	Negative	Negative	Negative	Negative	Negative
259	Positive	Negative	Negative	Negative	Negative	Negative	Negative	Negative	Negative	--	Negative	--	Negative	--	Negative	--	Positive	--	Negative
260	TND	Negative	TND	Negative	TND	Negative	TND	--	TND	--	TND	--	TND	--	TND	--	TND	--	--
261	Negative	Negative	Negative	Negative	Negative	Negative	Negative	Negative	Negative	Negative	Negative	Negative	Negative	Negative	Negative	Negative	Positive	Positive	Negative
262	Positive	Positive	Negative	Negative	Negative	Negative	Negative	Negative	Negative	Negative	Negative	Negative	Negative	Negative	Negative	Negative	Negative	Negative	Negative
263	Negative	--	Negative	--	Negative	--	Negative	--	Negative	--	Negative	--	Negative	--	Negative	--	Positive	--	Negative
264	Negative	Negative	Negative	Negative	Negative	Negative	Negative	Negative	Negative	Negative	Negative	Negative	Negative	Negative	Negative	Negative	Negative	Negative	Negative
265	Negative	Negative	Negative	Negative	Negative	Negative	Negative	--	Negative	--	Negative	--	Negative	--	Negative	--	Negative	--	QNS
266	Positive	Positive	Negative	Negative	Negative	Negative	Negative	--	Negative	--	Negative	--	Negative	--	Negative	--	Negative	--	Negative
267	Negative	QNS	Negative	QNS	Negative	QNS	Negative	QNS	Negative	QNS	Negative	QNS	Negative	QNS	Negative	QNS	Negative	QNS	--
268	Negative	Negative	Negative	Negative	Negative	Negative	Negative	--	Negative	--	Negative	--	Negative	--	Negative	--	Negative	--	Positive
269	Negative	Negative	Negative	Negative	Negative	Negative	Negative	--	Negative	--	Negative	--	Negative	--	Negative	--	Negative	Negative	--
270	Negative	Positive	Negative	--	Negative	--	Negative	--	Negative	--	Negative	--	Negative	--	Negative	--	Negative	--	Negative
271	Negative	Negative	Negative	Negative	Negative	Negative	Negative	Negative	Negative	Negative	Negative	--	Negative	--	Negative	--	Positive	Positive	Positive
272	Negative	Negative	Negative	Negative	Negative	Negative	Negative	--	Negative	--	Negative	--	Negative	--	Negative	--	Positive	--	Positive
273	Negative	Negative	Negative	Negative	Negative	QNS	Negative	Negative	Negative	--	Negative	Negative	Negative	--	Negative	--	Positive	--	Positive
274	Positive	Positive	Negative	Negative	Negative	Negative	Negative	Negative	Negative	Negative	Negative	Negative	Negative	Negative	Negative	Negative	Negative	Negative	--
275	Positive	Positive	Negative	Negative	Negative	--	Negative	--	Negative	--	Negative	--	Negative	--	Negative	--	Negative	--	Positive
276	Positive	--	Negative	--	Negative	Negative	Negative	--	Negative	--	Negative	--	Negative	--	Negative	--	Negative	--	Positive
277	Negative	Negative	Negative	Negative	Negative	Negative	Negative	--	Negative	--	Negative	--	Negative	--	Negative	--	Negative	--	Negative
278	Negative	Negative	Negative	Negative	Negative	Negative	Negative	Negative	Negative	Negative	Negative	Negative	Negative	Negative	Negative	Negative	Positive	Negative	Negative
279	Negative	Negative	Negative	Negative	Negative	Negative	Negative	Negative	Negative	--	Negative	--	Negative	--	Negative	--	Positive	--	Positive
280	Negative	Negative	Negative	Negative	Negative	--	Negative	--	Negative	--	Negative	--	Negative	--	Negative	--	Positive	--	Negative
281	Positive	Positive	Negative	Negative	Negative	Negative	Negative	Negative	Negative	Negative	Negative	Negative	Negative	Negative	Negative	Negative	Negative	Negative	Positive
282	Negative	Negative	Negative	Negative	Negative	Negative	Negative	Negative	Negative	Negative	Positive (aneuploidy)	Positive	Negative	Negative	Negative	Negative	Negative	Negative	Positive

## Sheet: S2.PPV
		Tissue +	Tissue -	Tissue Not Assessed	Tissue QNS	Total
EGFR Any activating Mutation*	cfDNA+	32	2	5	4	43		Sensitivity	0.820513
	cfDNA-	7	179	17	22	225		PPV	0.941176
	cfDNA TND	1	10	1	1	13		Specificity	0.98895
	cfDNA cancelled	0	0	1	0	1		NPV	0.962366
	Total	40	191	24	27	282		Concordance	0.959091
RET Fusion	cfDNA+	0	0	3	0	3		Sensitivity	-
	cfDNA-	0	57	192	16	265		PPV	-
	cfDNA TND	0	4	9	0	13		Specificity	1
	cfDNA cancelled	0	1	0	0	1		NPV	1
	Total	0	62	204	16	282		Concordance	1
ERBB2 Mutation	cfDNA+	1	0	2	0	3		Sensitivity	1
	cfDNA-	0	51	200	14	265		PPV	1
	cfDNA TND	0	4	9	0	13		Specificity	1
	cfDNA cancelled	0	0	1	0	1		NPV	1
	Total	1	55	212	14	282		Concordance	1
MET exon 14 skipping	cfDNA+	4	1	5	0	10		Sensitivity	0.8
	cfDNA-	1	51	189	17	258		PPV	0.8
	cfDNA TND	0	4	9	0	13		Specificity	0.980769
	cfDNA cancelled	0	1	0	0	1		NPV	0.980769
	Total	5	57	203	17	282		Concordance	0.964912
MET Amplification (ALL)	cfDNA+	1	5	8	1	15		Sensitivity	1
	cfDNA-	0	54	183	16	253		PPV	0.166667
	cfDNA TND	0	4	9	0	13		Specificity	0.915254
	cfDNA cancelled	0	1	0	0	1		NPV	1
	Total	1	64	200	17	282		Concordance	0.916667
MET Amplification (focal)	cfDNA+	0	0	4	1	5		Sensitivity	-
	cfDNA-	1	59	187	16	263		PPV	-
	cfDNA TND	0	4	9	0	13		Specificity	1
	cfDNA cancelled	0	1	0	0	1		NPV	0.983333
	Total	1	64	200	17	282		Concordance	0.983333
KRAS	cfDNA+	21	2	59	4	86		Sensitivity	0.875
	cfDNA-	3	43	126	10	182		PPV	0.913043
	cfDNA TND	0	4	8	1	13		Specificity	0.955556
	cfDNA cancelled	0	0	1	0	1		NPV	0.934783
	Total	24	49	194	15	282		Concordance	0.927536

## Sheet: S3. Per patient positive
	cfDNA result		Tissue results
Patient ID	Gene	Mutation	Gene	Mutation	PD-L1 status	Tumor Proportion Score
5	MET	AMP (aneuploidy)
6	KRAS	G12C
8	EGFR	L858R	EGFR	L858R
9	EGFR	Exon 19 deletion	EGFR	Exon 19 del
10	KRAS	G13F	KRAS	G13F	Positive	>= 50%
12			EGFR	L858R
13	RET	KIF5B-RET fusion
15					Positive	>= 50%
16	KRAS	G12C			Positive	>= 1%
17	MET	AMP (focal)	QNS		QNS
19	EGFR	T725M
20	KRAS	G12C
21	KRAS	G12C			Positive	>= 1%
22	KRAS	G12C			Positive	>= 50%
23	KRAS	G12C
24					Positive	>= 50%
25					Positive	>= 50%
26	MET	AMP (aneuploidy)			Positive	>= 50%
27					Positive	>= 50%
28	EGFR / MET	T725M / Exon 14 skipping			Positive	>= 50%
29	KRAS	G12V			Positive	>= 1%
31			EGFR	Exon19 deletion, T790M
32	KRAS	G12C	QNS		Positive	>= 50%
34	KRAS	G12C
35	KRAS	G12C
36	EGFR	L858R	EGFR	L858R
37	KRAS	G12V
38	KRAS	Q61H
40	KRAS	G12C			Positive	>= 50%
42	TND				Positive	>= 50%
44	KRAS	G12C			Positive	>= 50%
45					Positive	>= 1%
46					Positive	>= 50%
47					Positive	>= 50%
48	KRAS	G13C	KRAS	G13C	Positive	>= 1%
49	EGFR / KRAS	A289T / G12C
50	KRAS	G12D
51	KRAS	G12C			Positive	>= 50%
52	KRAS	G12D			Positive	>= 50%
53			KRAS		Positive	>= 50%
54	KRAS	G12C
55	EGFR	Exon 19 deletion	EGFR	Exon 19 deletion
56	KRAS	G12C	KRAS		Positive	>= 50%
57	EGFR / MET	L858R / AMP (aneuploidy)	EGFR	L858R
58			KRAS		Positive	>= 50%
59	KRAS	G12A	KRAS
61					Positive	>= 50%
63	KRAS	G12C
64	EGFR	L861Q	EGFR	L861Q	Positive	>= 1%
66	KRAS	Q61R			Positive	>= 50%
67					Positive	>= 50%
69					Positive	>= 1%
70	EGFR	L858R	EGFR	L858R	Positive	>= 50%
71	EGFR	Exon 20 insertion	EGFR	Exon 20 insertion	Positive	>= 1%
73	TND
74	EGFR	Exon 19 del
75	KRAS	G12C
76	TND				Positive	>= 1%
78					Positive	>= 1%
79					Positive	>= 50%
80			ROS1	ROS1 fusion	Positive	>= 50%
83	KRAS	G12V	KRAS		Positive	>= 1%
86	MET	Exon 14 skipping	MET	Exon 14 skipping	Positive	>= 50%
87	TND
89	TND		EGFR	Exon 19 deletion
90					Positive	>= 50%
92					Positive	>= 50%
93					Positive	>= 50%
95	ERBB2	S310Y			Positive	>= 1%
96			KRAS
97			EGFR	Exon 19 deletion	Positive	>= 50%
98	BRAF	V600E	BRAF	V600E	QNS
101					Positive	>= 1%
103	KRAS	G13C			Positive	>= 50%
106	KRAS	G13C
107	KRAS	G12D
108	KRAS	G12A			Positive	>= 50%
109					Positive	>= 50%
110					Positive	>= 1%
111	KRAS	G12D			Positive	>= 1%
112					Positive	>= 1%
113					Positive	>= 50%
114	KRAS	G12C			Positive	>= 50%
115					Positive	>= 1%
116	MET	AMP (focal)			Positive	>= 1%
118	KRAS	G12D			Positive	>= 50%
119	EGFR	L858R	QNS		QNS
120					Positive	>= 50%
121	MET	AMP (focal)			Positive	>= 50%
122	KRAS	G12C			Positive	>= 50%
123	TND
124	KRAS	G12V	KRAS
125	EGFR	Exon 19 deletion	EGFR	Exon 19 deletion
126			EGFR	Exon 20 insertion
127					Positive	>= 50%
128	ALK	EML4-ALK Fusion	ALK	ALK fusion
129	KRAS	G12R			Positive	>= 50%
130	MET	AMP (focal)			Positive	>= 50%
131	ALK	EML4-ALK Fusion	ALK	ALK fusion
132	KRAS	G12R	KRAS
133	MET	AMP (aneuploidy)			QNS
134	ALK	EML4-ALK Fusion
135					Positive	>= 50%
136	KRAS	G12D			QNS
137					Positive	>= 50%
138	KRAS	G12D			Positive	>= 1%
140	EGFR	Exon 19 deletion	EGFR	Exon 19 deletion
142	MET	AMP (aneuploidy)
143	EGFR	Exon 20 insertion	EGFR	Exon 20 insertion	Positive	>= 50%
144	KRAS	G12V	KRAS
148	EGFR	L858R	EGFR	L858R
149	EGFR	Exon 19 deletion	EGFR	Exon 19 deletion
150	KRAS	G12C			Positive	>= 1%
151	MET	AMP (aneuploidy)	ALK	EML4-ALK Fusion	Positive	>= 1%
152	KRAS	G12V	KRAS
153					Positive	>= 50%
154	KRAS	G12V	KRAS		Positive	>= 50%
155	ERBB2 / MET	Exon 20 insertion / AMP (aneuploidy)	ERBB2	Exon 20 insertion	Positive	>= 50%
157	MET	Exon 14 skipping	MET	Exon 14 skipping
159	MET / KRAS	Exon 14 skipping / G12D	KRAS		Positive	>= 1%
160	EGFR	Exon 19deletion, T790M	EGFR	Exon 19 deletion, T790M
161	EGFR	L858R	EGFR	L858R
163					Positive	>= 1%
164	KRAS	G12C
166	BRAF	V600E	BRAF	V600E	Positive	>= 1%
167	RET	KIF5B-RET fusion
168	EGFR	Exon 20 insertion
169		POSITIVE on BIP_37	ALK	ALK fusion
170	KRAS	G12V			Positive	>= 50%
171	EGFR	Exon 19 deletion	EGFR	Exon 19 deletion
172					Positive	>= 50%
173	KRAS	G12D
175	KRAS	G12V			QNS
176	TND
179					Positive	>= 1%
180	EGFR	Exon 19 deletion	EGFR	Exon 19 deletion
181	MET	Exon 14 skipping			Positive	>= 50%
182	ALK	DCTN1-ALK Fusion	ALK	ALK fusion	Positive	>= 50%
183	EGFR	L858R			QNS
185	EGFR	Exon 19 deletion	EGFR	Exon 19 deletion	Positive	>= 1%
186	KRAS	G12C			Positive	>= 50%
187	KRAS	G12C			Positive	>= 50%
188	ALK / KRAS	EML4-ALK Fusion / G12D	ALK	ALK fusion	Positive	>= 1%						23
189					Positive	>= 50%
190	EGFR	L858R	EGFR	L858R	QNS
191	TND				Positive	>= 50%
194	KRAS	Q61H			Positive	>= 50%
195	TND				Positive	>= 1%
196	KRAS	G12A			Positive	>= 50%
199	KRAS	G12C	KRAS		Positive	>= 50%
200	KRAS	G12C			Positive	>= 1%
201	KRAS	G12D			Positive	>= 50%
202					Positive	>= 1%
204	EGFR	Exon 19 deletion	EGFR	Exon 19 deletion	Positive	>= 1%
205			ALK	ALK fusion	Positive	>= 50%
206	EGFR	Exon 19 deletion	EGFR	Exon 19 deletion	Positive	>= 1%
207					Positive	>= 1%
208	TND		ALK
209	KRAS	G12C
210	EGFR	Exon 19 deletion	EGFR	Exon 19 deletion	Positive	>= 1%
211	MET	Exon 14 skipping
212					Positive	>= 1%
213	MET / KRAS	AMP (focal) / G12D	ROS1
214	EGFR	L858R	EGFR	L858R	Positive	>= 1%
215	KRAS	G13C			Positive	>= 50%
216					Positive	>= 50%
217					Positive	>= 50%
218	ALK	EML4-ALK Fusion	ALK
219	MET	Exon 14 skipping	MET	Exon 14 skipping	QNS
220					Positive	>= 1%
221	MET	Exon 14 skipping	MET	Exon 14 skipping	Positive	>= 1%
222	KRAS	G12A			Positive	>= 50%
223					Positive	>= 1%
224	KRAS	G12D
225			EGFR	Exon 19 deletion
226	KRAS	G13C			Positive	>= 1%
228	KRAS	G12C	KRAS		Positive	>= 1%
229	RET	KIF5B-RET fusion
230	MET / kRAS	Exon 14 skipping / Q61K	KRAS	Q61K	Positive	>= 50%
232	EGFR	Exon 19 deletion	EGFR	Exon 19 deletion	Positive	>= 50%
233	KRAS	G12V
236	KRAS	G12C	KRAS
237	KRAS	G12A
238	KRAS	G12D	KRAS		Positive	>= 50%
239					Positive	>= 1%
240	ERBB2	V659E
242	KRAS	G12V	KRAS
243	EGFR	T790M
244	KRAS	G12R			Positive	>= 1%
245	TND				Positive	>= 1%
246	KRAS	G12D	KRAS		Positive	>= 50%
247	EGFR	Exon 19 deletion	EGFR	Exon 19 deletion
249	KRAS	G12C			Positive	>= 50%
250			EGFR	G719A
252	KRAS	G12C			Positive	>= 1%
253	MET / KRAS	AMP (aneuploidy) / G12C	MET / KRAS	Exon 14 skipping / G12C
254	KRAS	G12A
255	EGFR	L833V			Positive	>= 1%
256	KRAS	G12C			Positive	>= 50%
257	EGFR / MET	Exon 19 deletion / AMP (aneuploidy)	EGFR	Exon 19 deletion
258	EGFR	L858R / Exon 14 skipping	EGFR	L858R
259	EGFR / KRAS	G719A / G12V	EGFR	G719A
260	TND
261	KRAS	G12D	KRAS
262	EGFR	Exon 19 deletion	EGFR	Exon 19 deletion
263	KRAS	G12C
266	EGFR	L858R	EGFR	L858R
267			QNS
268					Positive	>= 50%
270			EGFR	Exon 19 deletion
271	KRAS	G12S	KRAS		Positive	>= 50%
272	KRAS	G12D			Positive	>= 1%
273	KRAS	G12C			Positive	>= 50%
274	EGFR	Exon 19 deletion	EGFR	Exon 19 deletion
275	EGFR	Exon 19 deletion	EGFR	Exon 19 deletion	Positive	>= 1%
276	EGFR	G719A			Positive	>= 50%
278	KRAS	G12V
279	KRAS	G12A			Positive	>= 1%
280	KRAS	G12C
281	EGFR	Exon 19 insertion	EGFR	Exon 19 insertion	Positive	>= 50%
282	MET	AMP (aneuploidy)	MET	AMP	Positive	>= 50%

## Sheet: S4. Co-occurring PDL1
Patient ID	PD-L1 result	Tumor Proportion Score	cfDNA result	Tissue result
26	Positive	>= 50%	MET AMP (aneuploidy)	-
28	Positive	>= 50%	MET Exon 14 skipping	-
64	Positive	>= 1%	EGFR L861Q	EGFR L861Q
70	Positive	>= 50%	EGFR L858R	EGFR L858R
71	Positive	>= 1%	EGFR Exon 20 insertion	EGFR Exon 20 insertion
80	Positive	>= 50%	-	ROS1 fusion
86	Positive	>= 50%	MET Exon 14 skipping	MET Exon 14 skipping
95	Positive	>= 1%	ERBB2 S310Y	-
97	Positive	>= 50%	-	EGFR exon 19 deletion
116	Positive	>= 1%	MET AMP (focal)	-
121	Positive	>= 50%	MET AMP (focal)	-
130	Positive	>= 50%	MET AMP (focal)	-
143	Positive	>= 50%	EGFR Exon 20 insertion	EGFR Exon 20 insertion
151	Positive	>= 1%	MET AMP (aneuploidy)	EML4-ALK fusion
155	Positive	>= 50%	ERBB2 exon 20 insertion/MET AMP (aneuploidy)	ERBB2 Exon 20 insertion
159	Positive	>= 1%	MET Exon 14 skipping	-
166	Positive	>= 1%	BRAF V600E	BRAF V600E
181	Positive	>= 50%	MET Exon 14 skipping	-
182	Positive	>= 50%	DCTN1-ALK Fusion	ALK fusion
185	Positive	>= 1%	EGFR exon 19 deletion	EGFR exon 19 deletion
188	Positive	>= 1%	EML4-ALK fusion	ALK fusion
204	Positive	>= 1%	EGFR exon 19 deletion	EGFR exon 19 deletion
205	Positive	>= 50%	-	ALK fusion
206	Positive	>= 1%	EGFR exon 19 deletion	EGFR exon 19 deletion
210	Positive	>= 1%	EGFR exon 19 deletion	EGFR exon 19 deletion
214	Positive	>= 1%	EGFR L858R	EGFR L858R
221	Positive	>= 1%	MET Exon 14 skipping	MET Exon 14 skipping
230	Positive	>= 50%	MET Exon 14 skipping	-
232	Positive	>= 50%	EGFR exon 19 deletion	EGFR exon 19 deletion
255	Positive	>= 1%	EGFR L833V	-
275	Positive	>= 1%	EGFR exon 19 deletion	EGFR exon 19 deletion
276	Positive	>= 50%	EGFR G719A	-
281	Positive	>= 50%	EGFR exon 19 deletion	EGFR exon 19 deletion
282	Positive	>= 50%	MET AMP (aneuploidy)	MET AMP

## Sheet: S5. tissue vs cfDNA
		ctDNA+	ctDNA-	Total
EGFR Exon 19 del	Tissue +	18	4	22		Sensitivity	1
	Tissue-	0	201	201		PPV	0.818182
						Specificity	0.980488
						NPV	1
	Total	18	205	223		Concordance	0.982063
EGFR L858R
	Tissue +	9	1	10		Sensitivity	1
	Tissue-	0	213	213		PPV	0.9
						Specificity	0.995327
						NPV	1
	Total	9	214	223		Concordance	0.995516
EGFR Any activating Mutation*
	Tissue +	32	7	39		Sensitivity	0.941176
	Tissue-	2	179	181		PPV	0.820513
						Specificity	0.962366
						NPV	0.98895
	Total	34	186	220		Concordance	0.959091
ALK Fusion (ORIGINAL)
	Tissue +	5	3	8		Sensitivity	1
	Tissue-	0	207	207		PPV	0.625
						Specificity	0.985714
						NPV	1
	Total	5	210	215		Concordance	0.986047
ALK Fusion (rerun)
	Tissue +	6	2	8		Sensitivity	1
	Tissue-	0	207	207		PPV	0.75
						Specificity	0.990431
						NPV	1
	Total	6	209	215		Concordance	0.990698
ROS1 Fusion
	Tissue +	0	2	2		Sensitivity	-
	Tissue-	0	151	151		PPV	-
						Specificity	0.986928
						NPV	1
	Total	0	153	153		Concordance	0.986928
BRAF V6000E mutation
	Tissue +	2	0	2		Sensitivity	1
	Tissue-	0	90	90		PPV	1
						Specificity	1
						NPV	1
	Total	2	90	92		Concordance	1
RET Fusion	Tissue +	0	0	0		Sensitivity	-
	Tissue-	0	57	57		PPV	-
						Specificity	1
						NPV	1
	Total	0	57	57		Concordance	1
ERBB2 Mutation
	Tissue +	1	0	1		Sensitivity	1
	Tissue-	0	51	51		PPV	1
						Specificity	1
						NPV	1
	Total	1	51	52		Concordance	1
MET exon 14 skipping	Tissue +	4	1	5		Sensitivity	0.8
	Tissue-	1	51	52		PPV	0.8
						Specificity	0.980769
						NPV	0.980769
	Total	5	52	57		Concordance	0.964912
MET Amplification (ALL)	Tissue +	1	1	2		Sensitivity	0.166667
	Tissue-	5	57	62		PPV	0.5
						Specificity	0.982759
						NPV	0.919355
	Total	6	58	64		Concordance	0.90625
MET Amplification (focal)	Tissue +	0	1	1		Sensitivity	-
	Tissue-	0	62	62		PPV	-
						Specificity	0.984127
						NPV	1
	Total	0	63	63		Concordance	0.984127
KRAS	Tissue +	21	3	24		Sensitivity	0.913043
	Tissue-	2	43	45		PPV	0.875
						Specificity	0.934783
						NPV	0.955556
	Total	23	46	69		Concordance	0.927536

## Sheet: S6. NILE study sites 
Site Name	City	State	Investigator First Name	Investigator Last Name
Texas Oncology	Dallas	TX	Kartik	Konduri
The Center for Cancer and Blood Disorders	Fort Worth	TX	Ray	Page
Lancaster Cancer Center	Lancaster	PA	Lena	Dumasia
Vista Oncology	Olympia	WA	Joseph	Ye
Genesis Cancer Center	Hot Springs	AR	Fred	Divers
Swedish Cancer Institute	Seattle	WA	Jack	West
Nevada Cancer Research Foundation	Las Vegas	NV	John	Ellerton
The Mark H. Zangmeister Center	Columbus	OH	Tarek	Chidiac
St. Mary's Hospital & Regional Medical Center	Grand Junction	CO	Steven	Emmons
Phelps County Regional Medical Center	Rola	MO	Stephen	Toothaker
Providence Regional Medical Center Everett	Everett	WA	Jason	Lukas
Lindner Research Center at Christ Hospital	Cincinnati	OH	Manish	Bhandari
Carson Tahoe Cancer Center	Carson City	NV	Dina	Tack
Millennium Oncology	Houston	TX	Mary	Crow
Dignity Health Research Institute	Carmichael	CA	Sonia	Reichert
City of Hope	Duarte	CA	Karen	Reckamp
Princess Margaret Cancer Centre	Toronto	ON	Natasha	Leighl
Ventura County Hematology-Oncology Specialists	Camarillo	CA	Chirag	Dalsania
Wellness Oncology/Hematology	West Hills	CA	Ashkan	Lashkari
Miami Cancer Institute	Miami	FL	Miguel	Villalona-Calero
Salem Health	Salem	OR	John	Strother
Mercy Regional Center Redding	Redding	CA	Dyanesh	Ravindran
California Cancer Associates for Research and Excellence (cCARE)	Fresno	CA	Sachin	Gupta
Tennessee Oncology - Nashville	Nashville	TN	Melissa	Johnson
Tennessee Oncology - Chattanooga	Chattanooga	TN	Davey	Daniel
Florida Cancer Specialists - North	St. Petersburg	FL	Maen	Hussein
Florida Cancer Specialists - South	Ft. Myers	FL	James	Reeves
Florida Cancer Specialists - East	West Palm Beach	FL	Neal	Rothschild
